# Supplementary material for: Support for Relatives Bereaved by Psychiatric Patient Suicide: National Confidential Inquiry Into Suicide and Homicide Findings
Source: Atypon-hosted journal article supplement (doi:10.1176/appi.ps.201600004), 2016-12-01
Supplement: appi.ps.201600004.ds001.pdf [file appi.ps.201600004.ds001.pdf]

Appendix 1: Multivariate associations between potentially stigmatizing characteristics of patient suicides and whether contact was made with relatives excluding patients divorced, separated or widowed and who were not living with family members

| Case characteristic               | Any contact <i>versus</i> none |           |         | Face-to-face contact <i>versus</i> letter/telephone call |           |         |
|-----------------------------------|--------------------------------|-----------|---------|----------------------------------------------------------|-----------|---------|
|                                   | Adjusted OR <sup>†</sup>       | 95% CI    | p-value | Adjusted OR <sup>†</sup>                                 | 95% CI    | p-value |
| Violent method of suicide         | 1.68                           | 1.49-1.90 | <.001   | 1.28                                                     | 1.14-1.44 | <.001   |
| Unemployed                        | .75                            | .66-.84   | <.001   | .87                                                      | .77-.99   | .037    |
| Black & minority ethnic group     | .87                            | .73-1.06  | .163    | 1.13                                                     | .92-1.40  | .236    |
| Forensic history                  | .66                            | .56-.78   | <.001   | 1.02                                                     | .84-1.24  | .820    |
| Recent (<3 months) alcohol misuse | .91                            | .79-1.05  | .204    | .87                                                      | .74-1.02  | .078    |
| Recent (<3 months) drug misuse    | 1.19                           | .99-1.42  | .058    | 1.06                                                     | .88-1.28  | .552    |
| Alcohol dependence/misuse         | .40                            | .32-.50   | <.001   | .69                                                      | .50-.94   | .019    |
| Drug dependence/misuse            | .46                            | .35-.61   | <.001   | .88                                                      | .61-1.28  | .505    |

Appendix 2: Multivariate associations between potentially stigmatizing characteristics of patient suicides and whether contact was made with relatives, excluding open verdicts

| Case characteristic               | Any contact <i>versus</i> none |           |         | Face-to-face contact <i>versus</i> letter/telephone call |           |         |
|-----------------------------------|--------------------------------|-----------|---------|----------------------------------------------------------|-----------|---------|
|                                   | Adjusted OR <sup>†</sup>       | 95% CI    | p-value | Adjusted OR <sup>†</sup>                                 | 95% CI    | p-value |
| Violent method of suicide         | 1.68                           | 1.48-1.91 | <.001   | 1.25                                                     | 1.08-1.44 | .003    |
| Unemployed                        | .80                            | .71-.90   | <.001   | .89                                                      | .79-1.02  | .092    |
| Black & minority ethnic group     | .91                            | .73-1.12  | .371    | 1.07                                                     | .85-1.34  | .575    |
| Forensic history                  | .67                            | .57-.79   | <.001   | .92                                                      | .76-1.11  | .365    |
| Recent (<3 months) alcohol misuse | .91                            | .79-1.05  | .180    | .90                                                      | .77-1.05  | .171    |
| Recent (<3 months) drug misuse    | 1.09                           | .91-1.31  | .355    | 1.07                                                     | .88-1.31  | .495    |
| Alcohol dependence/misuse         | .48                            | .38-.61   | <.001   | .65                                                      | .48-.88   | .006    |
| Drug dependence/misuse            | .47                            | .34-.64   | <.001   | .80                                                      | .52-1.22  | .298    |



Appendix 3: Multivariate associations between potentially stigmatizing characteristics of patient suicides and whether contact was made with relatives, with missing contact recoded as no contact

| Any contact <i>versus</i> none    |                          |           |         |
|-----------------------------------|--------------------------|-----------|---------|
| Case characteristic               | Adjusted OR <sup>†</sup> | 95% CI    | p-value |
| Violent method of suicide         | 1.66                     | 1.51-1.82 | <.001   |
| Unemployed                        | .79                      | .72-.86   | <.001   |
| Black & minority ethnic group     | .95                      | .81-1.11  | .495    |
| Forensic history                  | .70                      | .62-.80   | <.001   |
| Recent (<3 months) alcohol misuse | .88                      | .79-.97   | .015    |
| Recent (<3 months) drug misuse    | 1.12                     | .98-1.29  | .095    |
| Alcohol dependence/misuse         | .51                      | .43-.60   | <.001   |
| Drug dependence/misuse            | .51                      | .41-.64   | <.001   |

Appendix 4: Multivariate associations between potentially stigmatizing characteristics of patient suicides and whether contact was made with relatives, adjusting for recent (<3 months) patient contact

| Case characteristic               | Any contact <i>versus</i> none |           |         | Face-to-face contact <i>versus</i> letter/telephone call |           |         |
|-----------------------------------|--------------------------------|-----------|---------|----------------------------------------------------------|-----------|---------|
|                                   | Adjusted OR <sup>†</sup>       | 95% CI    | p-value | Adjusted OR <sup>†</sup>                                 | 95% CI    | p-value |
| Violent method of suicide         | 1.63                           | 1.47-1.81 | <.001   | 1.28                                                     | 1.14-1.44 | <.001   |
| Unemployed                        | .80                            | .72-.89   | <.001   | .92                                                      | .83-1.03  | .169    |
| Black & minority ethnic group     | .88                            | .73-1.06  | .177    | 1.14                                                     | .94-1.387 | .181    |
| Forensic history                  | .69                            | .60-.79   | <.001   | .99                                                      | .84-1.16  | .88     |
| Recent (<3 months) alcohol misuse | .85                            | .75-.96   | .010    | .93                                                      | .82-1.07  | .322    |
| Recent (<3 months) drug misuse    | 1.04                           | .89-1.22  | .614    | 1.08                                                     | .91-1.27  | .372    |
| Alcohol dependence/misuse         | .56                            | .46-.68   | <.001   | .65                                                      | .50-.83   | .001    |
| Drug dependence/misuse            | .53                            | .41-.68   | <.001   | .88                                                      | .63-1.24  | .472    |
